# Supplementary material for: Ovarian mitochondrial dynamics and cell fate regulation in an androgen-induced rat model of polycystic ovarian syndrome
Source: PubMed Central journal article supplement (PMC6978404; doi:10.1038/s41598-020-57672-w), 2020-01-23

# Ovarian mitochondrial dynamics and cell fate regulation in an androgen-induced rat model of polycystic ovarian syndrome

Reza Salehi<sup>1</sup>, Hannah L. Mazier<sup>1, 2</sup>, Anne-Laure Nivet<sup>1,2</sup>, Arkadiy A. Reunov<sup>3</sup>, Patricia Lima<sup>1</sup>, Qi Wang<sup>1</sup>, Arianna Fiocco<sup>2,4</sup>, *Ciro Isidoro*<sup>4\*</sup> and Benjamin K. Tsang<sup>1, 2\*</sup>

<sup>1</sup>Chronic Disease Program, Ottawa Hospital Research Institute, Ottawa, Canada

<sup>2</sup>Department of Cellular & Molecular Medicine and Obstetrics & Gynecology, University of Ottawa, Ottawa, Canada

<sup>3</sup>Electron Microscopy Laboratory, University of Ottawa Heart Institute, Ottawa, Canada

<sup>4</sup>Laboratory of Molecular Pathology, Department of Health Sciences, Università del Piemonte Orientale "A. Avogadro", Via P. Solaroli 17, 28100, Novara, Italy

**Abbreviated title:** Mitochondrial dynamics and cell death in PCOS

**Keywords:** Drp1, LC3, Polycystic ovarian syndrome, Androgen, Autophagy, Gonadotropin

\*Co-corresponding authors:

**Professor Benjamin K. Tsang**

The Ottawa Hospital – General Campus; Critical Care Wing - 3 rd Floor, Room W3107  
[501 Smyth Road](#), Mail Box #511, Ottawa, Ontario K1H 8L6

Tel: 1-613-798-5555, Ext. 72926      Email: [btsang@ohri.ca](mailto:btsang@ohri.ca)

**Professor *Ciro Isidoro***

Laboratory of Molecular Pathology and Nanobioimaging, Department of Health Sciences, Università del Piemonte Orientale "A. Avogadro", Via P. Solaroli 17, 28100, Novara, Italy.

Tel: +39 0321 660507      Email: [ciro.isidoro@med.uniupo.it](mailto:ciro.isidoro@med.uniupo.it)

**Fig. 5**

eCG (20 IU/rat)  
DHT (83  $\mu$ g/day)

|   |   |   |   |
|---|---|---|---|
| - | - | + | + |
| - | + | - | + |

Inter-assay  
pool  
↓

LC3I (16 KDa)

LC3II (13 KDa)

[

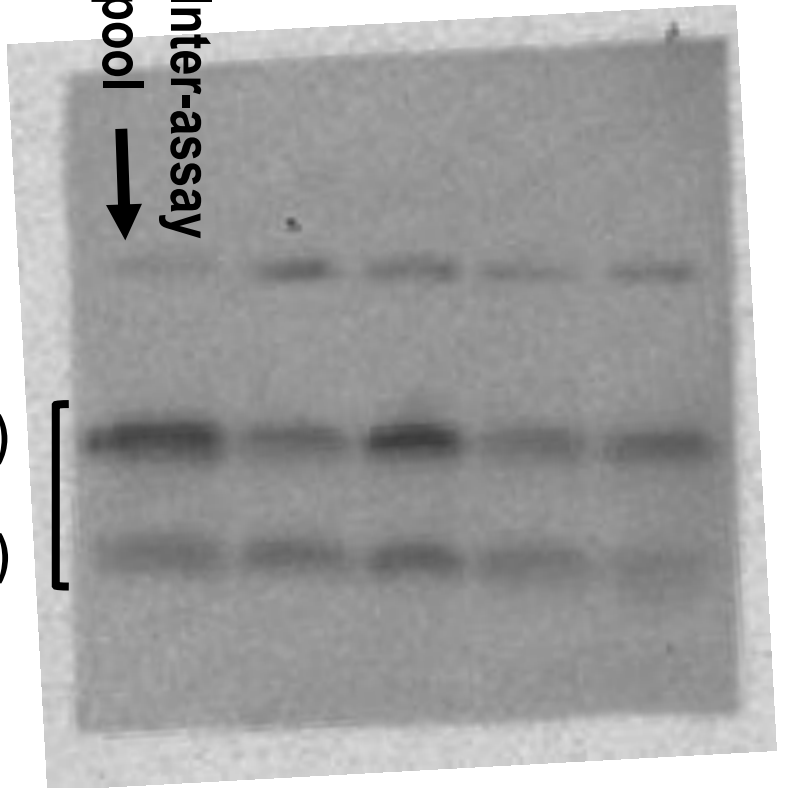

eCG (20 IU/rat)  
DHT (83  $\mu$ g/day)

|   |   |   |   |
|---|---|---|---|
| - | - | + | + |
| - | + | - | + |

Inter-assay  
pool  
↓

P62 (62 KDa)

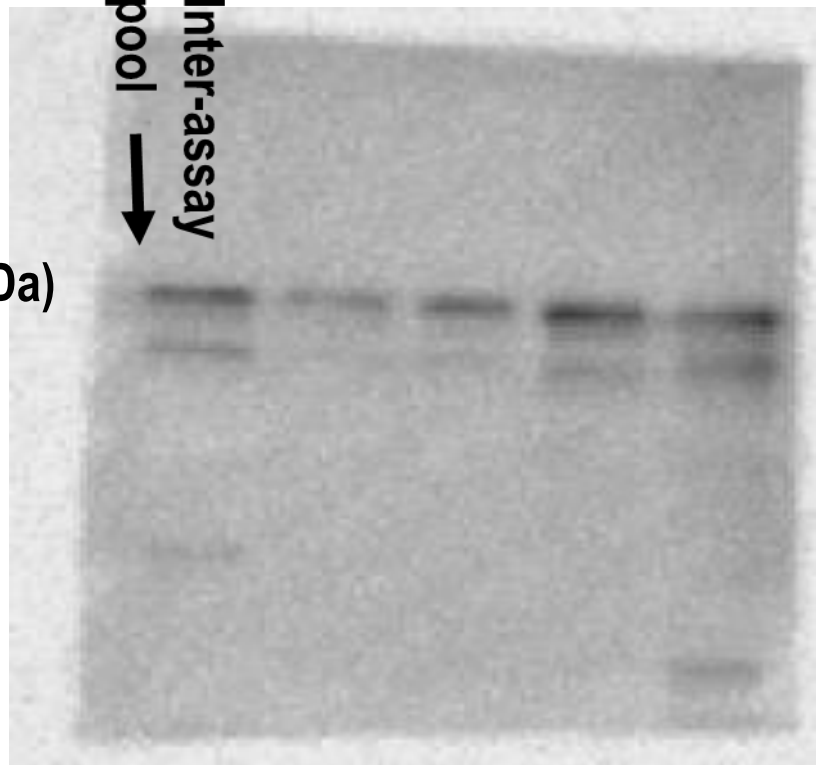

**Fig. 5**

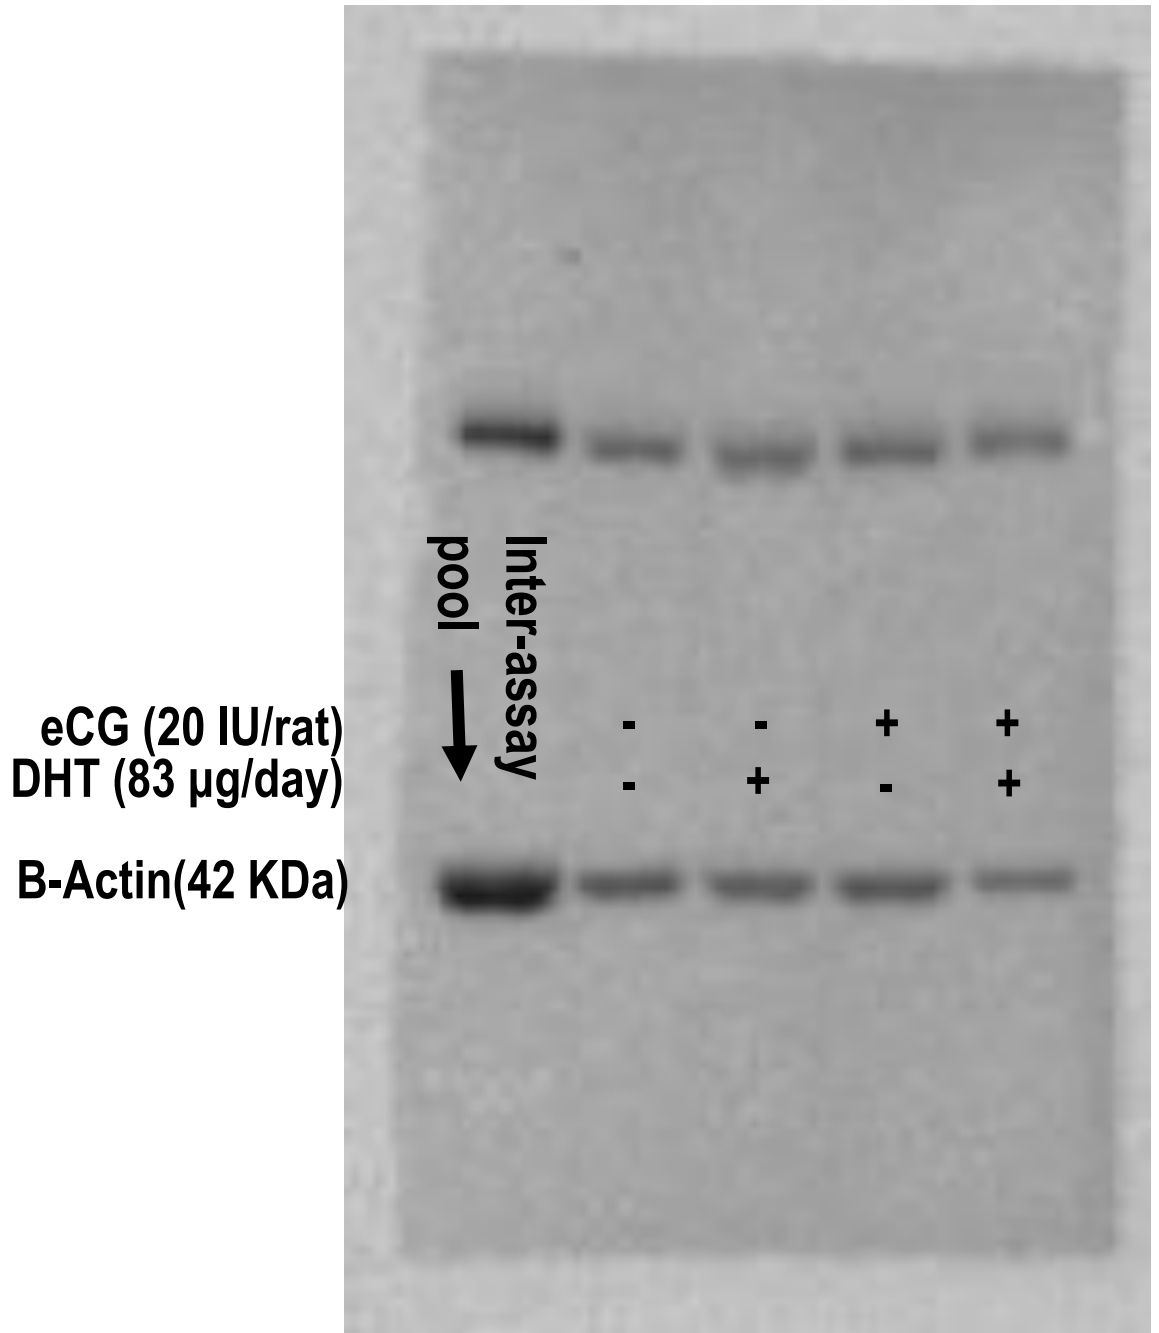

**Fig. 7**

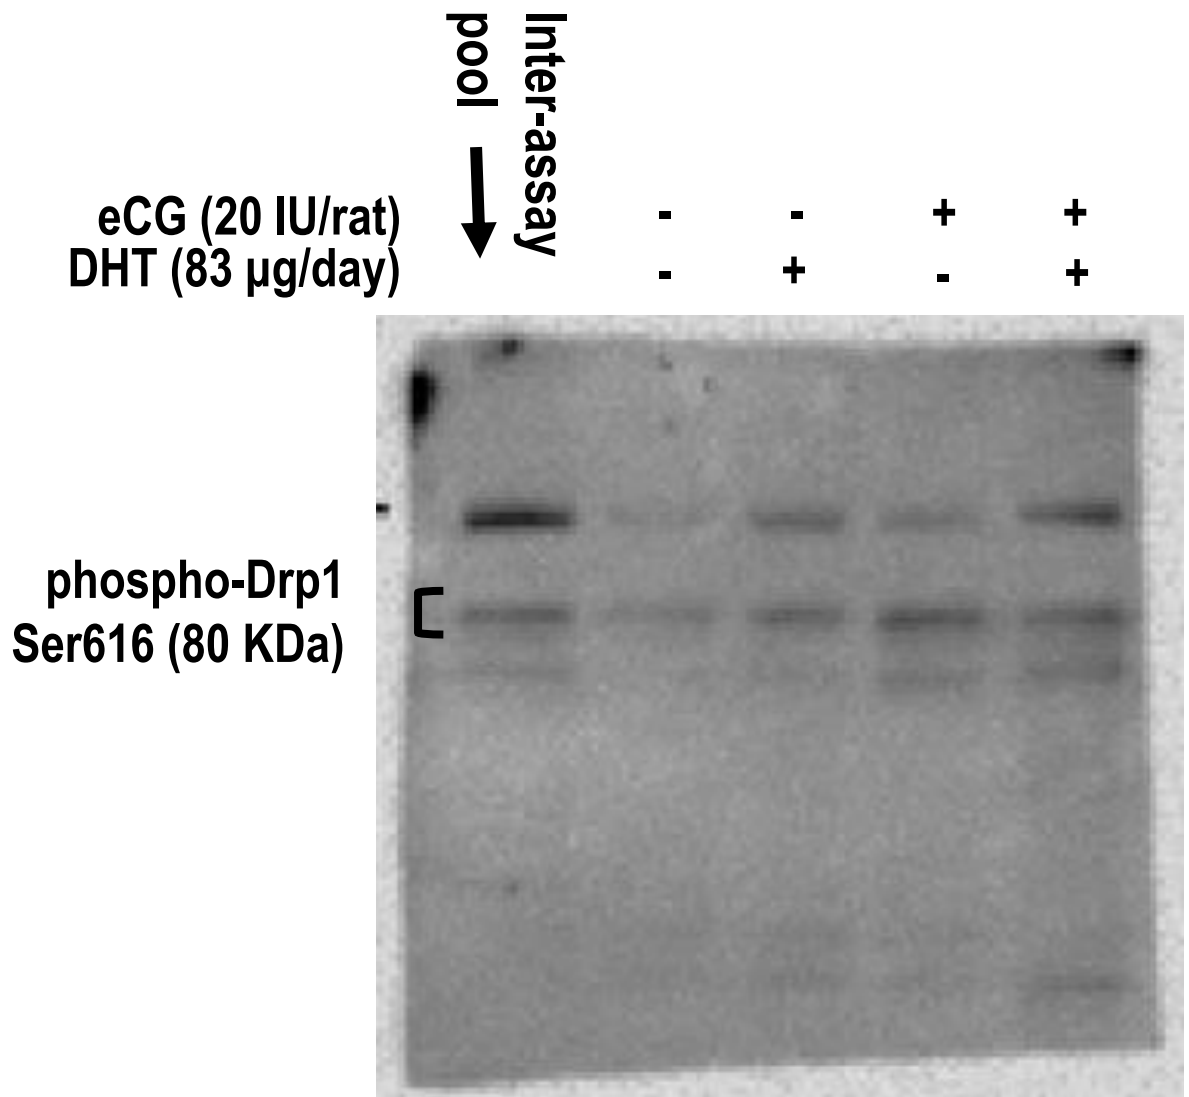

**Fig. 7**

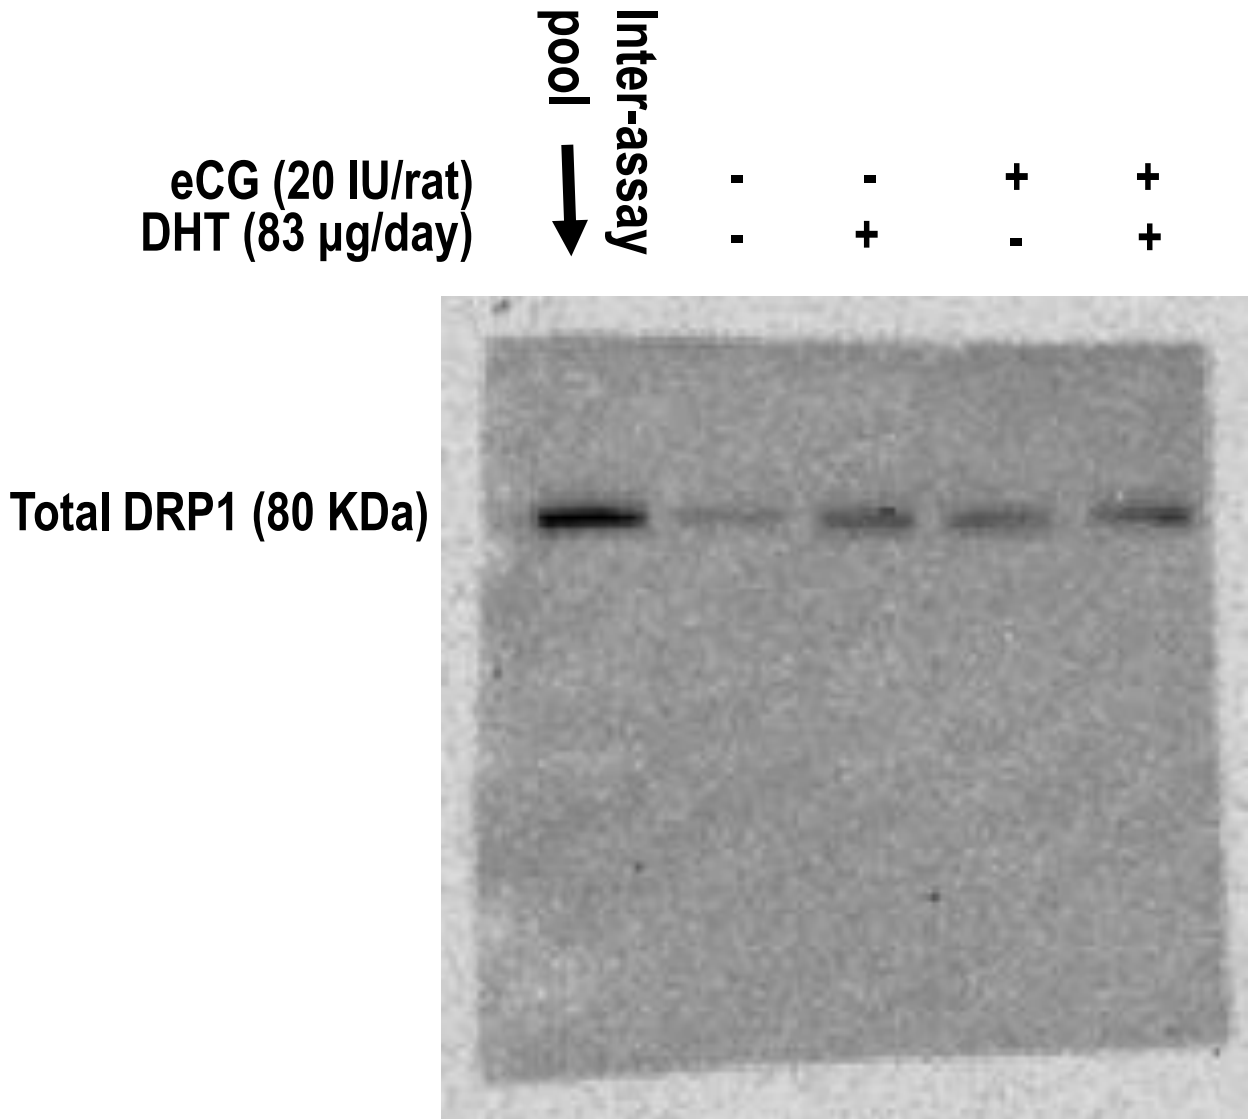

**Fig. 7**

eCG (20 IU/rat)  
DHT (83  $\mu$ g/day)  
B-Actin(42 KDa)

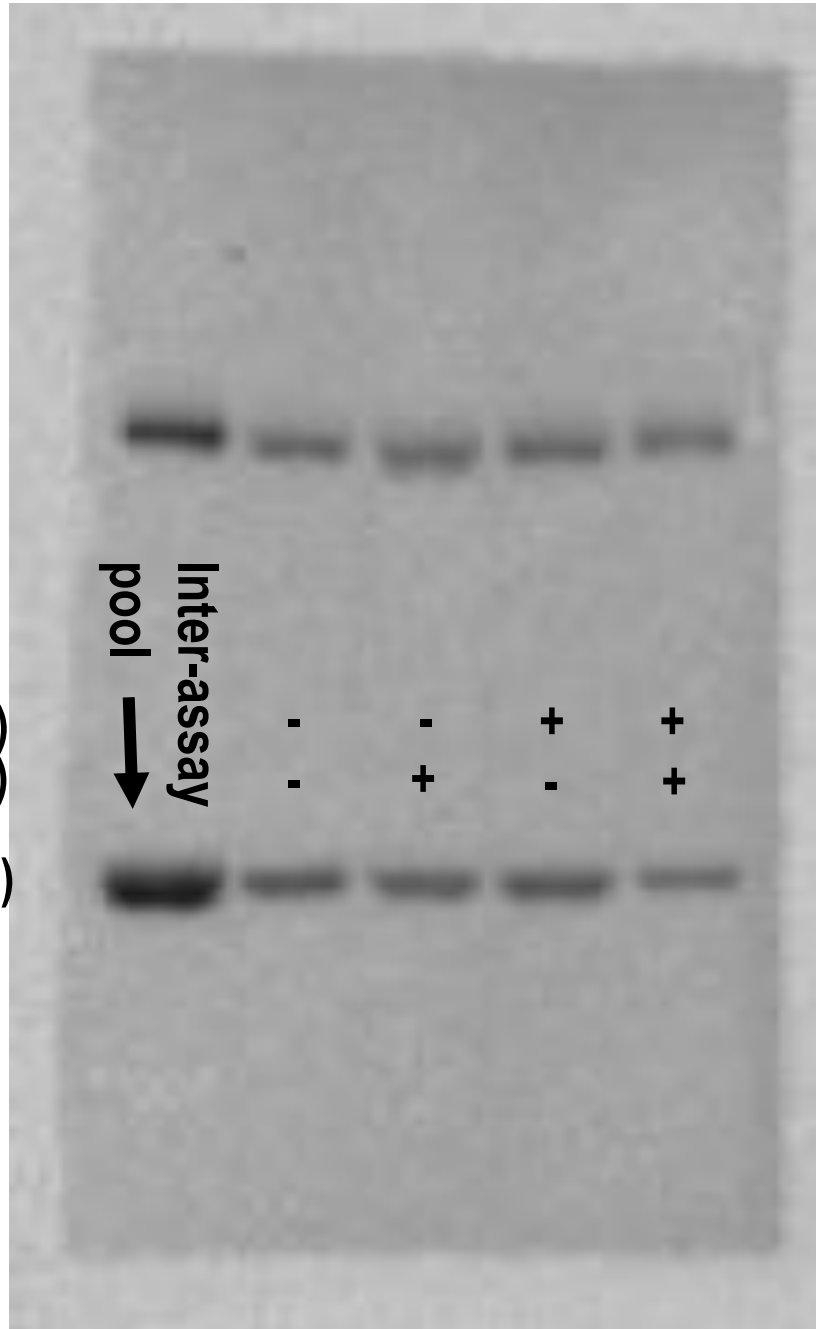

**Fig. 7**

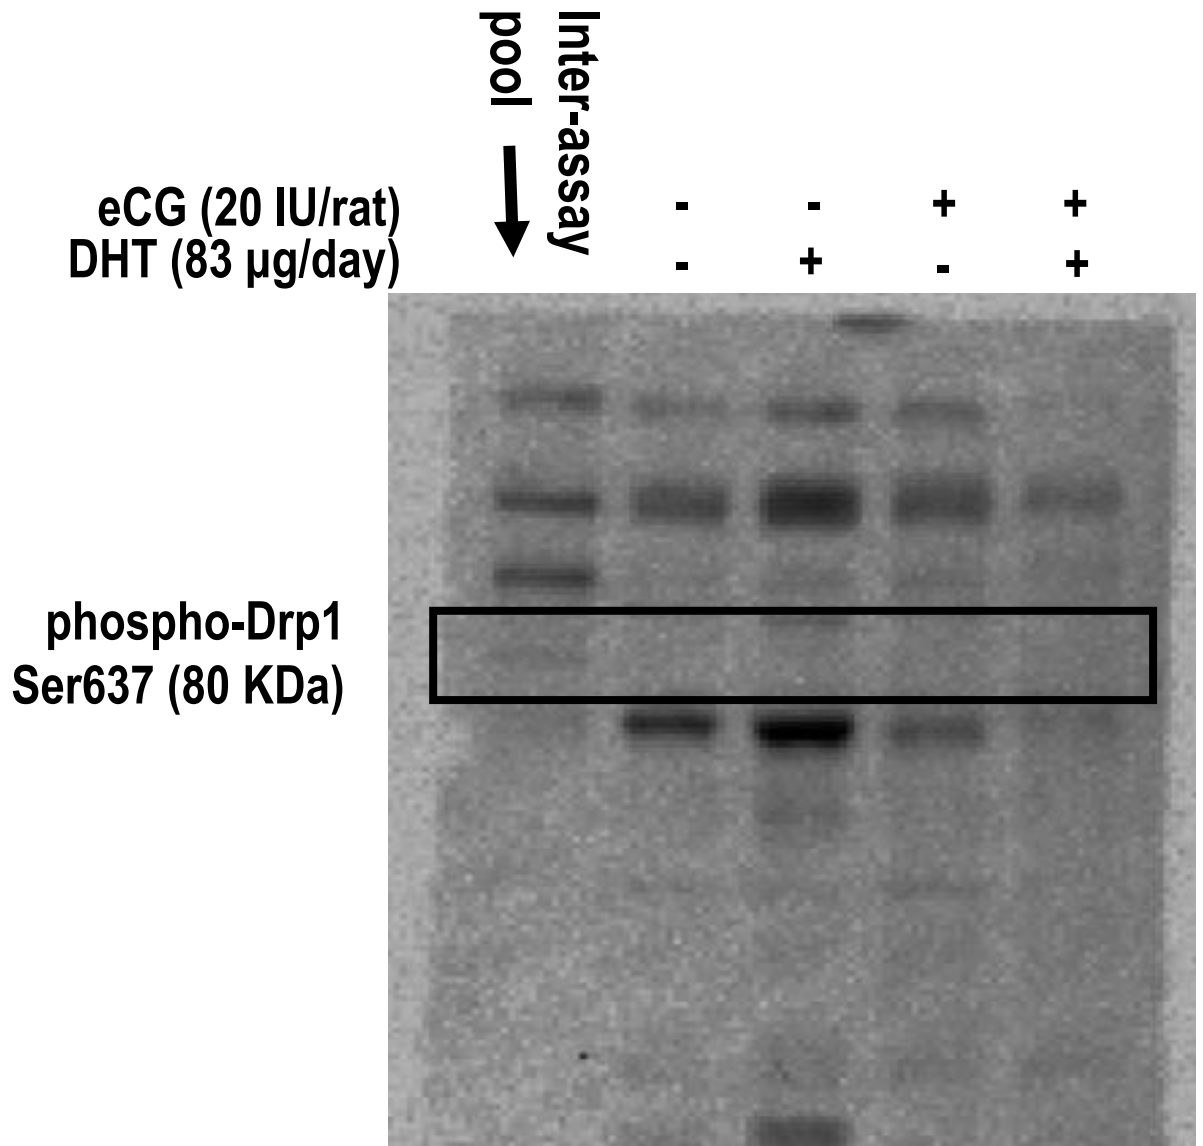

**Fig. 7**

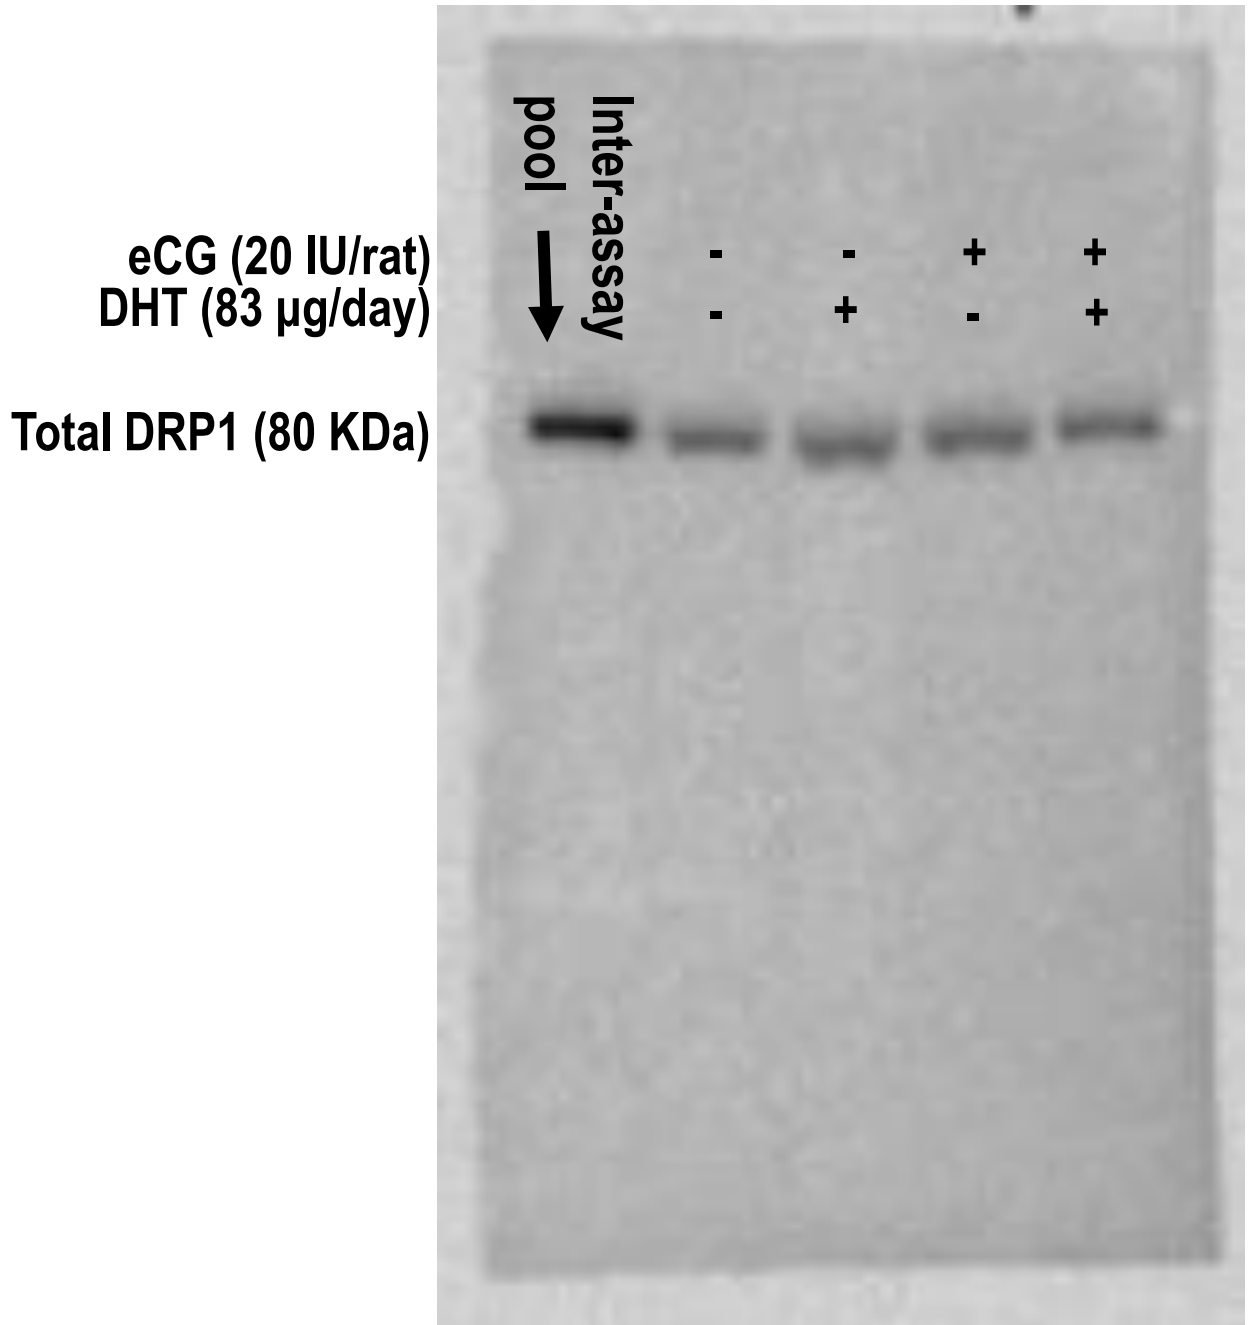



**Fig. 7**

**eCG (20 IU/rat)**  
**DHT (83 µg/day)**  
**B-Actin(42 KDa)**

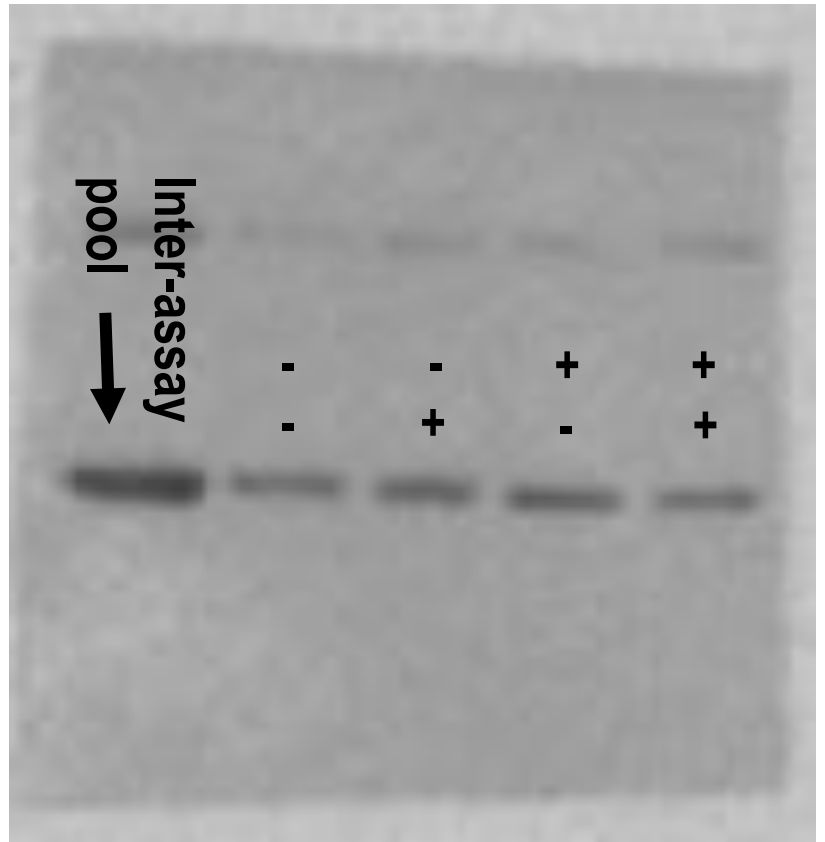

Supplement: 41598_2020_57672_MOESM1_ESM.pdf [file 41598_2020_57672_MOESM1_ESM.pdf]
